# Supplementary material for: Further evidence for spontaneous solid-state polymerisation reactions in 2,5-dibromothiophene derivativesElectronic supplementary information (ESI) available: X-ray data for DBMDTT, DBEDTT and DBPDTT. See http://www.rsc.org/suppdata/jm/b3/b307575n/
Source: Royal Society of Chemistry journal article supplement (doi:10.1039/b307575n), 2003-01-01
Supplement: b307575n.doc [file b307575n.doc]

**X-Ray crystallographic data and discussion for DBMDTT, DBEDTT and DPDTT**

All three compounds were recrystallised from dichloromethane to give large blocks of pale yellow crystals. X-ray crystallographic analysis of the materials revealed a variety of intermolecular short contacts in all three structures. For DBMDTT (Figure 1), a strong S(2)···Br(1) contact (3.4579 Å) forms chains of monomers, in which adjacent molecules are essentially orthogonal to each other. The chains are crosslinked *via* a Br(2)···C(2) interaction (3.4059 Å) to give a closely-knit packing motif for DBMDTT. In the structure of DBPDTT (Figure 2), the asymmetric unit consists of two molecules adopting different conformations. The monomers self-assemble into orthogonal dimers linked by Br(2)···Br(3) non-covalent bonds (3.5248 Å). One strong (Br(2)-S(5), 3.3873 Å) and two weak (Br(1)-S(4), 3.6199 and Br(2)-S(4), 3.6325 Å) S···Br contacts form polymeric links between monomer units and there is also a significant dimeric interaction (S(2)-S(2), 3.4948 Å) between one pair of equivalent sulfur atoms from the propylenedithio fragments. Molecules of DBEDTT assemble into a herring-bone pattern, in which once again adjacent units are orthogonal to each other (Figure 3a). Two different sets of zig-zag chains develop from Br(2)-Br(2) (3.5996 Å) and S(3)-S(3) (3.5287 Å) interactions (Figure 3b), and there is a third close contact forming chains of Br(1)-S(2) (3.5583 Å) links. The hydrogen atoms of the ethylene group have been omitted from Figure 3 for clarity, but these also contribute to the supramolecular structure through hydrogen bonding (H(1A)-Br(1), 2.9207 Å; H(2B)-S(2), 2.8727 Å; H(1B)-S(1), 2.9007 Å; H(2A)-S(2), 2.9974 Å). It is remarkable that every single peripheral atom of the DBEDTT molecule is involved in a short contact with an atom from a neighbouring molecule, ensuring that the molecules are closely packed in the solid state.


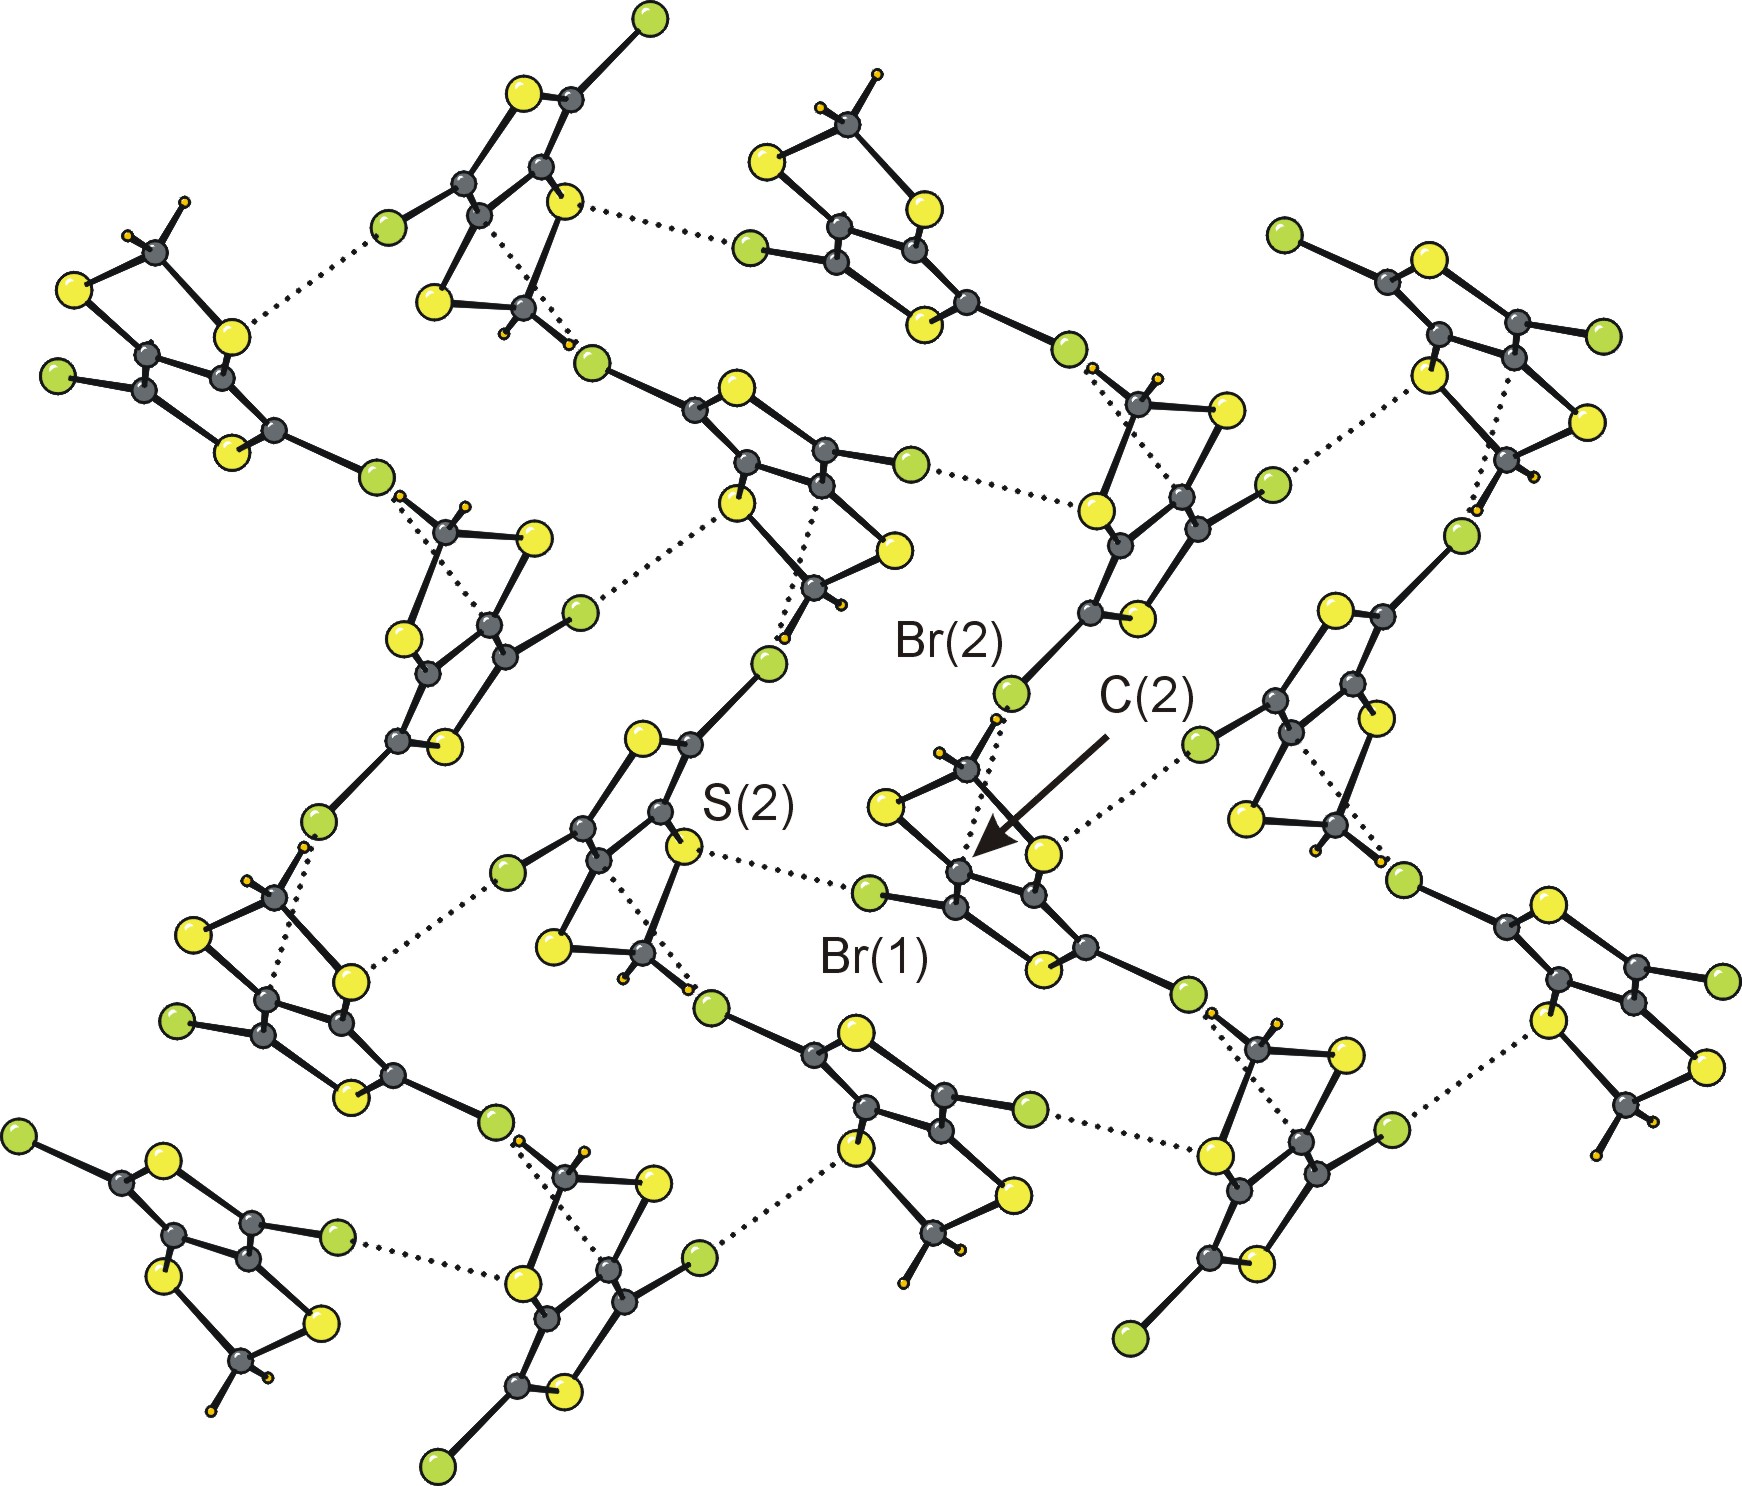


***Figure S1*** X-ray crystal structure of DBMDTT viewed along the a axis.


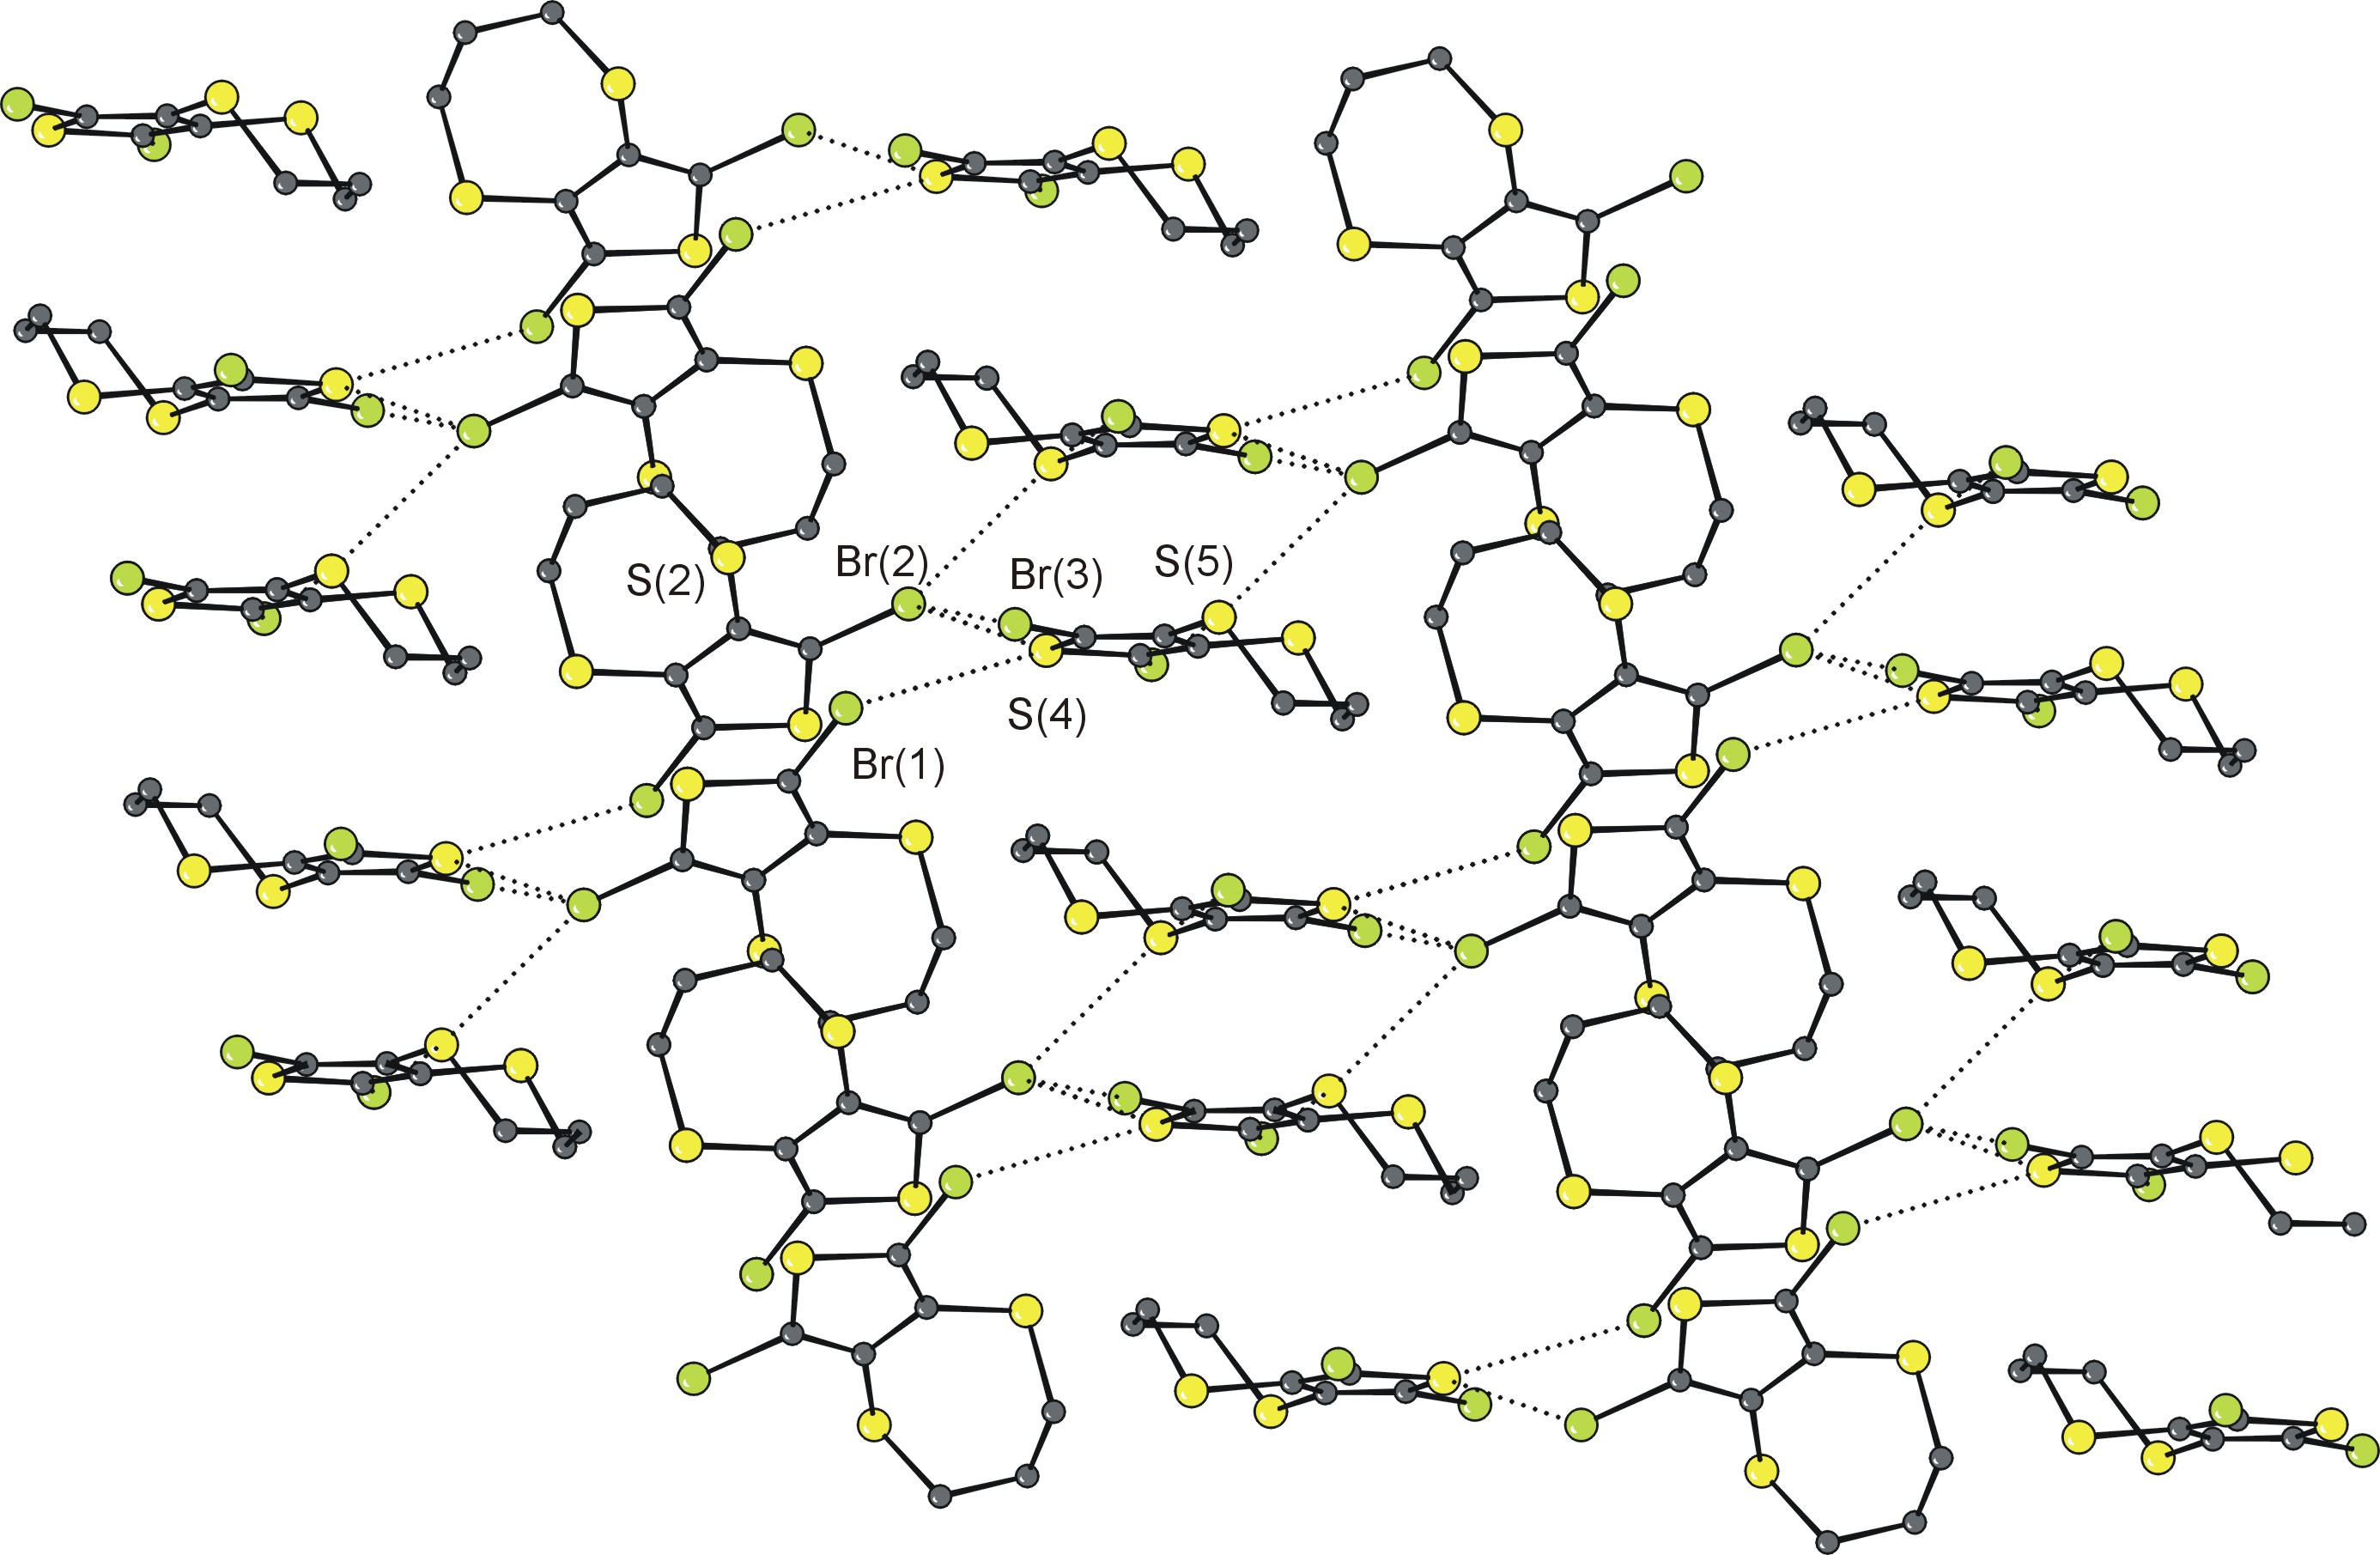


***Figure S2*** X-ray crystal structure of DBPDTT viewed along the a axis. S···Br and Br···Br close contacts are shown, however S···S interactions and H atoms have been omitted for clarity.


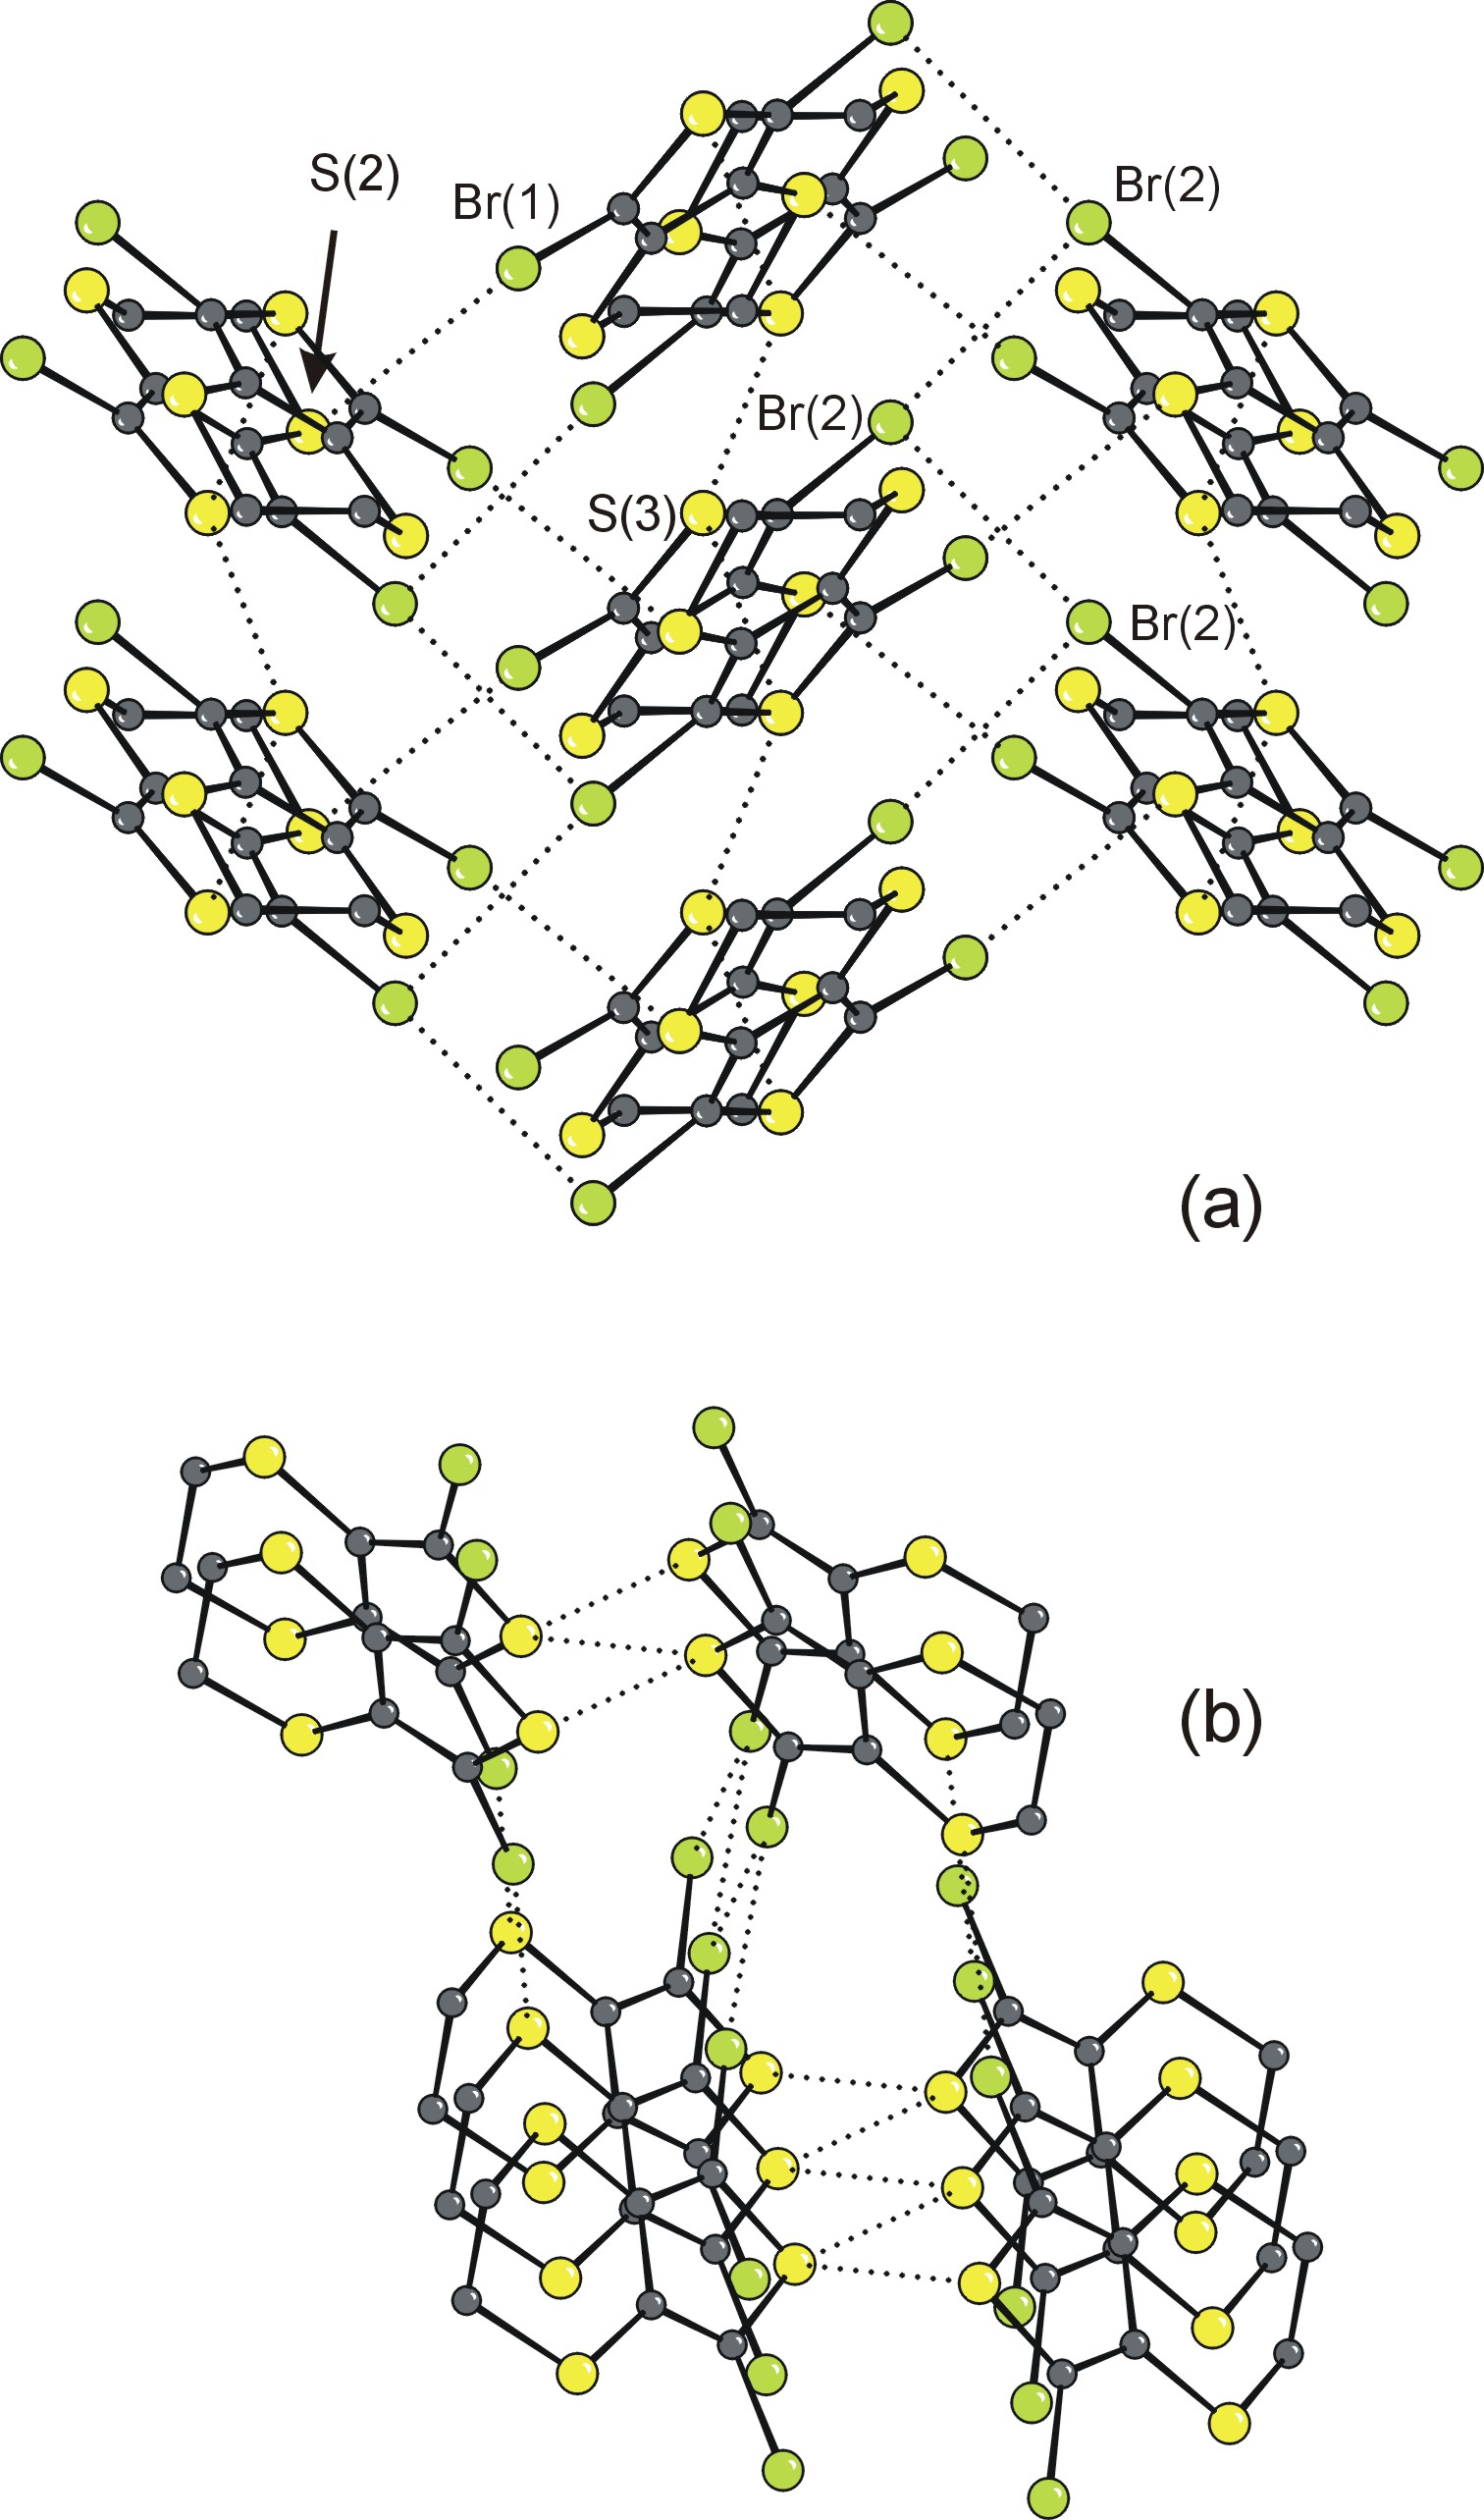


***Figure S3*** X-ray crystal structure of DBEDTT (a) viewed along the c axis; (b) zig-zag chains from S(3)-S(3) and Br(2)-Br(2) interactions. H atoms have been omitted for clarity.

**Crystal data for DBMDTT.** C5H2Br2S3, M = 318.07, monoclinic, *a* = 7.4164(2), *b* = 11.0544(3), *c* = 10.6791(4) Å, ** = 105.3610(10)º, *U* = 844.24(5) Å3, *T* =120(2) K, space group *P*21/*n*, *Z* = 4, *µ*(Mo–Ka) = 0.707 mm-1, 8570 reflections measured, 1927 unique (*Rint* = 0.1888) which were used in all calculations. The final *wR*(*F*2) was 0.1516 (all data).

**Crystal data for DBEDTT.** C6H4Br2S3, M = 332.09, monoclinic, *a* = 13.1863(4), *b* = 5.1102(2), *c* = 14.3454(4) Å, ** = 105.854(2)º, *U* = 929.89(5) Å3, *T* =120(2) K, space group *P*21/*n*, *Z* = 4, *µ*(Mo–Ka) = 0.707 mm-1, 9677 reflections measured, 2139 unique (*Rint* = 0.1160) which were used in all calculations. The final *wR*(*F*2) was 0.1034 (all data).

**Crystal data for DBPDTT.** C7H6Br2S3, M = 346.12, triclinic, *a* = 8.7028(2), *b* = 9.1688(3), *c* = 15.0660(5) Å, ** = 75.4570(10), ** = 89.666(2), ** = 64.081(2)º, *U* = 1039.13(5) Å3, *T* =120(2) K, space group *P*-1, *Z* = 4, *µ*(Mo–Ka) = 0.707 mm-1, 8771 reflections measured, 4709 unique (*Rint* = 0.0287) which were used in all calculations. The final *wR*(*F*2) was 0.1391 (all data).
